1 **Expression quantitative trait methylation analysis reveals methylomic associations with**  
2 **gene expression in childhood asthma**

3

4 Soyeon Kim, PhD<sup>1</sup>, Erick Forno, MD, MPH<sup>1</sup>, Rong Zhang<sup>2</sup>, Qi Yan, PhD<sup>1</sup>, Nadia Boutaoui,  
5 PhD<sup>1</sup>, Edna Acosta-Pérez, PhD<sup>3</sup>, Glorisa Canino, PhD<sup>3</sup>, Wei Chen, PhD<sup>1</sup>, Juan C. Celedón, MD,  
6 DrPH<sup>1</sup>

7

8 <sup>1</sup>Division of Pulmonary Medicine, Department of Pediatrics, UPMC Children's Hospital of  
9 Pittsburgh, University of Pittsburgh, Pittsburgh, PA

10 <sup>2</sup>Department of Statistics, University of Pittsburgh, Pittsburgh, PA, USA

11 <sup>3</sup>Behavioral Sciences Research Institute, University of Puerto Rico, San Juan, PR

12

13 **Corresponding Author:** Juan C. Celedón, MD, DrPH

14 Division of Pediatric Pulmonary Medicine

15 UPMC Children's Hospital of Pittsburgh

16 4401 Penn Avenue, Pittsburgh, PA 15224

17 Phone: 412.692.8429; Fax: 412.692.7636

18 Email: [juan.celedon@chp.edu](mailto:juan.celedon@chp.edu)

19

20

21 **Abstract**

22  
23 Nasal airway epithelial methylation profiles have been associated with asthma, but the effects of  
24 such profiles on expression of distant cis-genes are largely unknown. We identified 16,867  
25 significant methylation-gene expression pairs in nasal epithelium from Puerto Rican children and  
26 adolescents (with and without asthma) in an expression quantitative trait methylation (eQTM)  
27 analysis of cis-genes located within 1 Mb of the methylation probes tested. Most eQTM  
28 methylation probes were distant from their target genes, and more likely located in enhancer  
29 regions of their target genes in lung tissue than control probes. The top 500 eQTM genes were  
30 enriched in pathways for immune processes and epithelial integrity, and also more likely to be  
31 differentially expressed in atopic asthma. Moreover, we identified 5,934 paths through which  
32 methylation probes could affect atopic asthma through gene expression. Our findings suggest  
33 that distant epigenetic regulation of gene expression in airway epithelium plays a role in atopic  
34 asthma.

35

36

37

38

39

40

41

42

43

## 44 **Introduction**

45 Asthma is affected not only by genetic variants but also by environmental factors such as  
46 second-hand smoke. Since DNA methylation is determined by both genetics and environment,  
47 studying methylation in relevant tissues may be key to understanding asthma pathogenesis.

48  
49 A growing body of evidence suggests that abnormalities in airway epithelial integrity and  
50 function leads to interactions between injurious agents (such as pollutants and viruses) and  
51 dendritic cells, altered immune responses, and -ultimately- asthma. DNA methylation and gene  
52 expression in nasal (airway) epithelium are well correlated with those in bronchial (airway)  
53 epithelium<sup>1</sup>.

54  
55 Because bronchial epithelial sampling requires a bronchoscopy (an invasive and costly procedure  
56 with non-trivial risks), nasal epithelial sampling is an attractive and safe approach for studies of  
57 the airway epithelium and childhood asthma<sup>1</sup>. Indeed, a few epigenome-wide association studies  
58 (EWAS) have identified links between DNA methylation in nasal airway epithelium and asthma.  
59 For example, we reported 7,104 CpGs associated with atopic (allergic) asthma in Puerto Ricans,  
60 an ethnic group disproportionately affected with this disease<sup>2</sup>.

61  
62 In our prior EWAS, we estimated the effect of CpGs associated with atopic asthma on the  
63 expression of nearby genes (i.e. those adjacent to or containing a CpG of interest)<sup>2</sup>. More  
64 recently, we showed that most single nucleotide polymorphisms (SNPs) associated with asthma  
65 in a large meta-analysis of genome-wide association studies (GWAS) are not associated with  
66 expression of nearby genes, but rather that of more distant cis-genes within 1 Mb. Given such

67 findings, we were interested in examining whether methylation of specific CpG sites is  
68 associated with expression of non-nearby cis-genes. We thus conducted an expression  
69 quantitative trait methylation (eQTM) analysis in nasal airway epithelium from 455 Puerto  
70 Ricans ages 9 to 20 years, including 219 subjects with asthma (cases) and 236 control subjects.

71

## 72 **Results**

### 73 **Location of eQTM-methylation probes relative to paired genes**

74 By testing associations between methylation probes within 1 Mb of transcription start sites (TSS)  
75 of genes and gene expression, we identified 16,867 significant methylation-expression pairs  
76 (FDR- $P < 0.01$ , see Methods), comprising 9,103 methylation probes associated with expression  
77 of 3,512 genes. We then investigated the position of significant methylation probes in this eQTM  
78 analysis in relation to their paired genes. If a methylation probe was associated with expression  
79 of multiple genes, we counted such probe for each gene. We found that 11% and 89% of  
80 significant eQTM probes were located within and outside genes, respectively –including 4% of  
81 eQTM probes in promoter regions (**Figure 1a**). Most eQTM methylation probes were distant  
82 from their target genes (371,840 bp on average) (**Figure 1b**).

83

84 Because we found distant relationships between methylation and their target genes, we assessed  
85 whether eQTM methylation probes in nasal epithelium are enriched in the enhancer regions of  
86 their paired genes. For this, we checked the enhancer database for lung tissue  
87 (<http://enhanceratlas.org/>)<sup>3</sup>, since nasal epithelial tissue was not available in that database, and  
88 nasal and bronchial epithelial methylation and expression are well correlated<sup>1</sup>. We found that

89 eQTM methylation probes are more likely to be located in enhancer regions of their paired genes  
90 than randomly selected control probes (p-value:  $1.3 \times 10^{-213}$ ) (**Figure 1c, Table 1**).

91  
92 While most methylation probes near TSS were negatively correlated with gene expression, more  
93 distant pairs tended to be positively correlated (**Figure 1d**). Of the eQTM methylation probes  
94 associated with expression of the gene they were located in, 81.9% were negatively correlated  
95 with expression (85.3% if in promoter regions) (**Figure 1e**). In contrast, only 40.2 % of eQTM  
96 methylation probes associated with expression of a distant gene (i.e. methylation probes outside  
97 of the associated gene) were negatively correlated with expression levels (**Figure 1f**).

98  
99 Most of the top eQTM genes (by eQTM P-value) have been implicated in lung disease (**Figure**  
100 **2**). *PAX8* is associated with bronchodilator response in children with asthma<sup>4</sup>, *ECHDC3* is  
101 associated with obesity and asthma in children<sup>5</sup>, *LSP1* is associated with acute lung inflammation  
102 <sup>6</sup>, *HLA-DQB1* is associated with asthma<sup>7</sup> and total IgE<sup>8</sup>, *FRG1B* is highly mutated in lung  
103 adenocarcinoma<sup>9</sup>, and *KANSL1* is associated with pulmonary function<sup>10</sup>.

### 104 105 **Gene Ontology enrichment analysis**

106 We performed a Gene Ontology enrichment analysis including the top 500 eQTM genes. In this  
107 analysis, 34 (69.4%) of the 49 most significant gene ontology categories were related to immune  
108 processes (**Figure 3a**); the second most enriched category was cell adhesion/activation.

109 We then investigated whether the top 500 eQTM genes are enriched for various diseases by  
110 examining significant SNPs from the GWAS catalog (<https://www.ebi.ac.uk/gwas/>). Most

111 enriched diseases were related to abnormal immunity (e.g., inflammatory bowel disease and IgA  
112 nephropathy) (**Figure 3b**) and pulmonary diseases (e.g., sarcoidosis, pneumonia, and asthma).

113

#### 114 **eQTM methylation probes and genes are significantly associated with atopic asthma**

115 We connected our eQTM results with those from our previous EWAS of atopic asthma<sup>2</sup>, using a  
116 genome-wide FDR-P <0.01. First, we found that only 429 (6.1%) of the 7,046 CpGs that were  
117 significantly associated with atopic asthma in our prior EWAS were associated with expression  
118 of nearby genes in the eQTM analysis (**Figure 1b**). Second, CpGs that were significant in the  
119 eQTM analysis were over-represented among CpGs that were significantly associated with  
120 atopic asthma in our prior EWAS, compared to randomly selected control CpGs (p-value < 2.2x  
121 10<sup>-16</sup>) (**Figure 4a and Table 2**).

122

123 Next, we checked whether the 3,512 significant eQTM genes identified in the current analysis  
124 are differentially expressed (DE) in atopic asthma (at genome-wide FDR-P <0.01), by checking  
125 the results of our recently published TWAS<sup>11</sup>. Indeed, these 3,512 eQTM genes are significantly  
126 more likely to be differentially expressed genes (DEGs) in atopic asthma than 3,512 randomly  
127 selected genes (P-value = 1.53x10<sup>-59</sup>) (**Figure 4b and Table 3**).

128

129 To test whether methylation affects atopic asthma through regulation of gene expression, we  
130 conducted a mediation analysis. In this analysis, we found 5,934 paths in which methylation of  
131 CpGs affect atopic asthma through gene expression, consisting of 2,817 methylation probes and  
132 1,943 genes (**Table 4**). Of all the associations between eQTM methylation probes and atopic  
133 asthma, 89.4% were mediated by gene expression (**Figure 4c**). Likewise, 93.3% of the eQTM

134 genes associated with atopic asthma mediate the association between methylation and atopic  
135 asthma (**Figure 4d**).

136

### 137 **eQTM results in EVA-PR are replicated in an African American cohort.**

138 To attempt replication of our eQTM results in EVA-PR, we used public data from GSE65205<sup>12</sup>,  
139 which includes both methylation and gene expression array data in nasal epithelium for 69  
140 children (36 with atopic asthma and 33 healthy controls, mostly [91.3%] African American).  
141 Using a similar approach to that used in EVA-PR, this replication eQTM analysis was adjusted  
142 for age, sex, race/ethnicity, atopic asthma status, and unobserved batch effects.

143

144 Of the 16,867 significant associations between methylation and gene expression in EVA-PR, we  
145 were able to test 14,397 associations in GSE65205, due to differences in the platforms used to  
146 assess gene expression (RNA-Seq vs. microarray). Of these 14,397 methylation-expression pairs,  
147 12,559 (87.2 %) had the same direction of association in GSE65205. Despite the small sample  
148 size of GSE65205, 6,562 (45.6%) of the significant associations in EVA-PR were replicated at  
149 FDR-P < 0.05, in the same direction of association (**Table 5**). These replicated associations  
150 include 3,992 methylation probes and 1,106 genes. Of the 3,992 replicated methylation probes,  
151 3,222 probes were tested in our prior EWAS in EVA-PR<sup>2</sup>: 1,412 (43.8%) of these 3,222 probes  
152 are significantly associated with atopic asthma (FDR-P < 0.05) (**Table 6**).

153

## 154 **Discussion**

155 To date, there have been much fewer eQTM studies than eQTL studies<sup>13</sup>, despite probable large  
156 joint causal effects of DNA methylation and gene expression on complex diseases. While

157 genotype does not change as a disease progresses, both epigenetic regulation and transcriptomic  
158 activity change as a disease develops or worsens. Thus, studying eQTM may complement  
159 findings from genetic or eQTL studies and add novel insights into disease pathogenesis.

160  
161 Most previous genome-wide eQTM studies have been limited to healthy subjects<sup>14,15</sup>. In the few  
162 instances in which both subjects with asthma and healthy controls were included, only CpGs that  
163 were significant in an EWAS –and only genes nearby those CpGs (e.g., within 10 kb)– were  
164 examined<sup>16-18</sup>. In contrast, we assessed all genome-wide CpGs along with expression of cis-  
165 genes located within 1 Mb in the current analysis of children and adolescents with and without  
166 asthma. Moreover, we were able to replicate nearly half of our significant findings in an  
167 independent cohort of predominantly African American children.

168  
169 Notably, in our analysis most significant eQTM methylation probes were not nearby their target  
170 cis-genes, a finding that may be explained by physical contact between CpG sites and  
171 promoter/coding regions of distant target genes through looping chromatin structures<sup>19</sup>.  
172 Significant eQTM probes were also more likely to be localized in enhancer regions of their target  
173 genes in lung tissue than control probes, suggesting that CpG sites can affect transcription of  
174 non-nearby (distant) cis-genes through enhancer activity. We also found that while most  
175 methylation probes near TSS were negatively correlated with gene expression, more distant pairs  
176 tended to be positively correlated. Consistent with our findings, methylation in promoter regions  
177 and the first intron have been negatively correlated with gene expression, while methylation of  
178 more distant CpG sites and gene expression has been positively correlated with gene expression  
179 in several types of cancer<sup>20,21 22</sup>.



180 We show an over-representation of the top eQTM methylation probes among CpGs associated  
181 with atopic asthma. Similarly, we report an over-representation of the top eQTM genes among  
182 DEG in atopic asthma. Moreover, we show that most associations between eQTM methylation  
183 probes and atopic asthma are mediated by gene expression. Given that we also found that eQTM  
184 methylation probes in nasal epithelium are over-represented in enhancer regions of their paired  
185 genes in lung tissue, our findings provide further support for studies of nasal epithelial  
186 epigenomics and transcriptomics as a valid alternative to more invasive and costly studies of  
187 bronchial epithelium.

188  
189 We recognize several study limitations. First, we only included subjects in a high-risk population  
190 (Puerto Ricans). However, we have previously replicated findings from GWAS<sup>9</sup> and EWAS<sup>11</sup> of  
191 asthma in Puerto Ricans in other racial or ethnic groups, including non-Hispanic whites, African  
192 Americans, and members of other Hispanic subgroups. Moreover, about half of the significant  
193 eQTM pairs in the current analysis in Puerto Ricans were significant in African Americans,  
194 despite the small sample size of the replication cohort. Second, we cannot confirm causal  
195 relationships in this cross-sectional study, in which asthma could have led to methylation  
196 changes or vice versa.

197  
198 In summary, we identified significant methylation-expression pairs in an eQTM analysis of nasal  
199 airway epithelium of subjects with and without asthma. Most methylation probes were associated  
200 with expression of distant cis-genes, and eQTM genes were enriched in immune regulation and  
201 epithelial integrity. Moreover, eQTM methylation probes and eQTM genes were over-

202 represented among those associated with atopic asthma, further suggesting a key role of  
203 epigenetic regulation of gene expression in airway epithelium in disease pathogenesis.

## 204 **Methods**

### 205 **Study population**

206 Subject recruitment and study procedures for the Epigenetic Variation and Childhood Asthma in  
207 Puerto Ricans (EVA-PR) have been previously described<sup>2</sup>. In brief, EVA-PR is a case-control  
208 study of asthma in subjects aged 9-20 years. Participants with and without asthma were recruited  
209 from households in San Juan (PR) from February 2014 through May 2017, using multistage  
210 probability sampling; 638 households had  $\geq 1$  eligible subject, and 543 (85.1%) subjects (one per  
211 household) agreed to participate. There were no significant differences in age or sex between  
212 eligible children who did and did not participate. The study was approved by the institutional  
213 review boards of the University of Puerto Rico (San Juan, PR) and the University of Pittsburgh  
214 (Pittsburgh, PA). Written parental consent and assent were obtained from participants  $< 18$  years  
215 old, and consent was obtained from participants  $\geq 18$  years old.

216  
217 The study protocol included questionnaires on respiratory health, measurement of serum  
218 allergen-specific IgEs, and collection of nasal epithelial samples for DNA and RNA extraction.  
219 Atopy was defined as  $\geq 1$  positive IgE ( $\geq 0.35$  IU/mL) to five common allergens in Puerto Rico:  
220 house dust mite (Der p 1), cockroach (Bla g 2), cat dander (Fel d 1), dog dander (Can f 1), and  
221 mouse urinary protein (mus m 1). Asthma was defined as a physician's diagnosis plus at least  
222 one episode of wheeze in the previous year. Control subjects had neither physician-diagnosed  
223 asthma nor wheeze in the previous year.

224

## 225 **Genome-wide study of DNA methylation and RNA sequencing**

226 DNA and RNA were extracted from nasal specimens collected from the inferior turbinate. To  
227 account for potential effects of different cell types, we implemented a protocol in a subset of  
228 nasal samples (n=31) to select CD326-positive nasal epithelial cells before DNA and  
229 RNA extraction. Whole-genome methylation assays were done with HumanMethylation450  
230 BeadChips (Illumina), as previously described<sup>2</sup>. Beta-values, ranging from 0 to 1, were  
231 calculated to measure percentage methylation at each CpG site. We then transformed beta values  
232 to M values because M values are closer to having a normal distribution (for linear regression  
233 analysis). As previously described, RNASeq was conducted with the Illumina NextSeq 500  
234 platform (Illumina), paired-end reads at 75 cycles, and 80M reads/sample; reads were aligned to  
235 reference human genome (hg19) and transcripts per kilobase million (TPM) were used as proxy  
236 for gene expression level<sup>2</sup>. We excluded genes with low expression levels (mean TPM < 1) and  
237 genes whose transcription start site (TSS) was unavailable in hg19. TPM values were  
238 transformed to  $\log_2(\text{TPM}+1)$  for data analysis.

239

## 240 **eQTM analysis**

241 We focused on identifying cis-eQTMs (i.e., CpGs regulating transcription of neighboring genes),  
242 due to limited power to perform a trans analysis (i.e., CpGs regulating distant genes)<sup>23</sup>. Thus, we  
243 only considered methylation probes within 1 Mb from the TSS of a gene. Using this criterion, we  
244 tested 8,552,964 methylation-gene expression pairs in analyses with and without adjustment for  
245 covariates. The unadjusted analysis was conducted to filter out potential false positive signals  
246 due to adjustment for batch effects<sup>24,25</sup>. Of the 24,171 methylation-expression pairs with a false-  
247 discovery rate-adjusted P < 0.01 (FDR-P, see below) in the adjusted analysis, 7,304 pairs had an

248 FDR- $P \geq 0.01$  in the unadjusted analysis and were thus excluded from further consideration. Thus,  
249 we identified 16,867 methylation-expression pairs that were significant in both unadjusted and  
250 adjusted analyses.

251  
252 For the adjusted analysis, we fitted a multivariate linear regression model;  $y = \beta_0 + \beta_1 M +$   
253  $T\alpha + \varepsilon$ , where  $y$  is gene expression,  $M$  is methylation value at a probe,  $T$  represents other  
254 covariates, and  $\beta_0$ ,  $\beta_1$ , and  $\alpha$  are their regression coefficients. In this analysis, other covariates  
255 were asthma and atopy status, age, gender, the top five principal components from genotypic  
256 data, RNA sample sorting protocol (i.e., whole-cells or CD326-positive nasal epithelial cells),  
257 methylation and RNA-Seq batch, and latent factors that capture data heterogeneity from  
258 methylation and RNA-seq - estimated from R package *sva*<sup>26</sup>. To conduct an efficient analysis,  
259 we used matrix eQTL package<sup>27</sup> to obtain P-values. FDR- $P$  values were then calculated, based  
260 on all the methylation-expression pairs tested. For the unadjusted model, we only included  
261 methylation value as the following;  $y = \beta_0 + \beta_1 M + \varepsilon$ .

262

### 263 **Epigenome-wide association study (EWAS) of atopic asthma**

264 The EWAS conducted by Forno et al<sup>2</sup> included 273 Puerto Rican subjects in EVA-PR (169 with  
265 atopic asthma and 104 control subjects without atopy or asthma). After quality controls, 227,836  
266 methylation probes were evaluated in a multivariable logistic regression model, as follows:  
267  $\text{logit}(p) = \beta_0 + \beta_1 M + \sum \alpha_j Z_j$ , where  $p$  is the probability of having atopic asthma,  $M$  is a  
268 methylation value at a probe,  $Z_j$  is an adjusted covariate, and  $\beta_0$ ,  $\beta_1$ , and  $\alpha_j$  are regression  
269 coefficients. Other covariates included in the model were the first five PCs derived from  
270 genotypic data, age, gender, methylation batches, and latent factors of methylation -estimated

271 from R package sva<sup>26</sup>. FDR-P values were then calculated based on testing 227,836 methylation  
272 probes. Significance was defined as FDR-P <0.01.

273

### 274 **Transcriptome-wide association studies (TWAS) of atopic asthma**

275 A TWAS of atopic asthma was recently conducted by Forno et al<sup>11</sup> in 258 Puerto Rican subjects  
276 in EVA-PR (157 with atopic asthma and 101 non-atopic non-asthmatic control subjects). In that  
277 study, differential gene expression was analyzed based on the raw count table of RNA  
278 sequencing data used using the R package DESeq2. Multivariable models of atopic asthma were  
279 adjusted for age, gender, RNA batches, RNA cell sorting, and the first five PCs derived from  
280 genotypic data. FDR-P were calculated for the 18,311 genes tested. Significance was defined as  
281 an FDR-P <0.01.

282

### 283 **Mediation analysis**

284 To understand how methylation affects asthma through gene expression as a putative mediator,  
285 we conducted mediation analyses to identify indirectly associated methylation CpGs to atopic  
286 asthma through gene expression. We used the Baron and Kenny approach<sup>28</sup> instead of the Sobel  
287 method<sup>29</sup>, due to differences in sample size between the eQTM analysis (including all subjects)  
288 and that for atopic asthma (including only subjects with atopic asthma and non-atopic controls).

289

290 To have a significant mediation of gene expression, all of the following needed to be significant:

291 1) the association between methylation and gene expression 2) the association between  
292 methylation and atopic asthma 3) the association between gene expression and atopic asthma.

293 For #1, we only considered eQTM methylation probes and genes as candidates for the mediation

294 tests. For #2, we recalculated FDR-P values of the result from our prior EWAS<sup>2</sup> only for the  
295 eQTM probes, to reduce multiple testing. For #3, we conducted a TWAS fitting a logistic  
296 regression model:  $\text{logit}(p) = \beta_0 + \beta_1 X + \sum \alpha_j A_j$ , where  $p$  is the probability of having atopic  
297 asthma,  $X$  is a gene,  $A_j$  is an adjusted covariate, and  $\beta_0$ ,  $\beta_1$ , and  $\alpha_j$  are regression coefficients.  
298 The adjusted covariates included in the model were the first five PCs derived from genotypic  
299 data, age, gender, whether RNA samples were from CD326-positive nasal epithelial cells, RNA  
300 batches, and a latent factor of gene expression, calculated from the R package *sva*<sup>26</sup>.

## 301 **Acknowledgements**

302  
303

304 This study was supported by grants HL079966, HL117191, MD011764 (to Juan C. Celedón),  
305 and U54MD007587 (to the University of Puerto Rico) from the U.S. National Institutes of  
306 Health (NIH). Dr. Kim is supported by a T32 training grant (HL129949) from the U.S. NIH. Dr.  
307 Forno's contribution was supported by NIH grant HL125666. Dr. Yan's contribution was  
308 supported by NIH grant K01 HL138098.

## 309 **Author Contributions**

310

311 W.C. and J.C.C. conceived and designed the study. S.K. conducted the primary analysis and  
312 interpreted data. E.F., R.Z., Q.Y., N.B., E.A-P., and G.C. participated in data collection and data  
313 analysis. S.K., E.F., W.C. and J.C.C. prepared the first draft of the manuscript. All authors  
314 reviewed the draft for intellectual content, and approved submission of the final version of the  
315 manuscript.

## 316 **Competing Interests**

317

318 J.C.C. has received research materials from Merck and GSK (inhaled steroids) and Pharmavite  
319 (vitamin D and placebo capsules), in order to provide medications free of cost to participants in  
320 NIH-funded studies, unrelated to the current work.

321

## 322 **Data Availability**

323 Datasets generated and analyzed during the current study are not publicly available because we  
324 did not obtain consent for such public release of epigenetic and transcriptomic data from  
325 participants. However, raw data to generate figures and tables are available from the  
326 corresponding author with the appropriate permission from the EVA-PR study team and the  
327 corresponding author upon reasonable request and institutional review board approval.

328

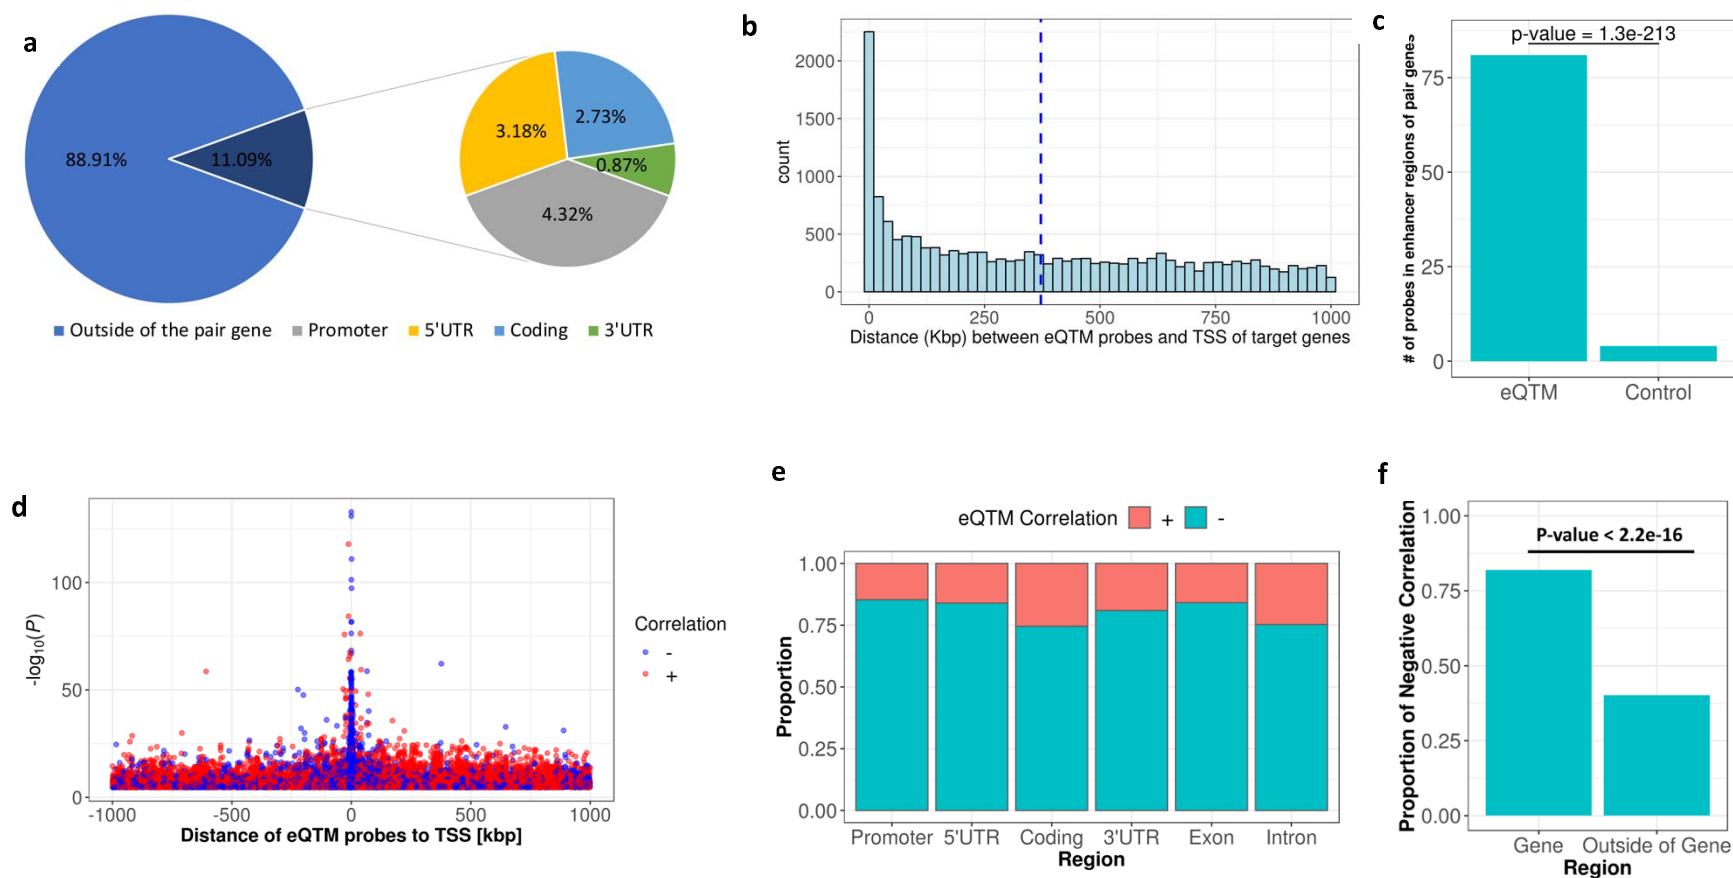

**Figure 1. Characterization and distribution of genomic location of eQTM signals for 16,867 eQTM pairs in nasal epithelium (FDR-P < 0.01)** **a.** The left chart depicts whether the probes are located inside of their paired genes. The right chart shows the specific location of probes located inside of their paired genes. **b** Distance between eQTM methylation probes and transcription start sites (TSS) of their target genes in kb pairs. **c.** Number of probes located in enhancer regions of their target genes in lung tissue. eQTM probes vs. controls (the same number of eQTM probes). Fisher's exact test was conducted to calculate the P value. **d.** Positive/Negative correlation regarding the distance between methylation and TSS and the p-value in the eQTM analysis. **e.** The bar graph shows, within each gene region, the proportion of positive or negative correlation of the eQTM pairs. The correlation is Pearson's correlation. **f.** The proportion of negatively correlated eQTM pairs inside (from promoter to 3'UTRs) and outside genes. The number of eQTM probes inside a gene is 1,871 and the number of the eQTM probes outside of a gene is 14,996. A chi-square test was conducted to examine the association between the region (whether the probe is located in the gene or outside of the gene) and the sign of the correlation.



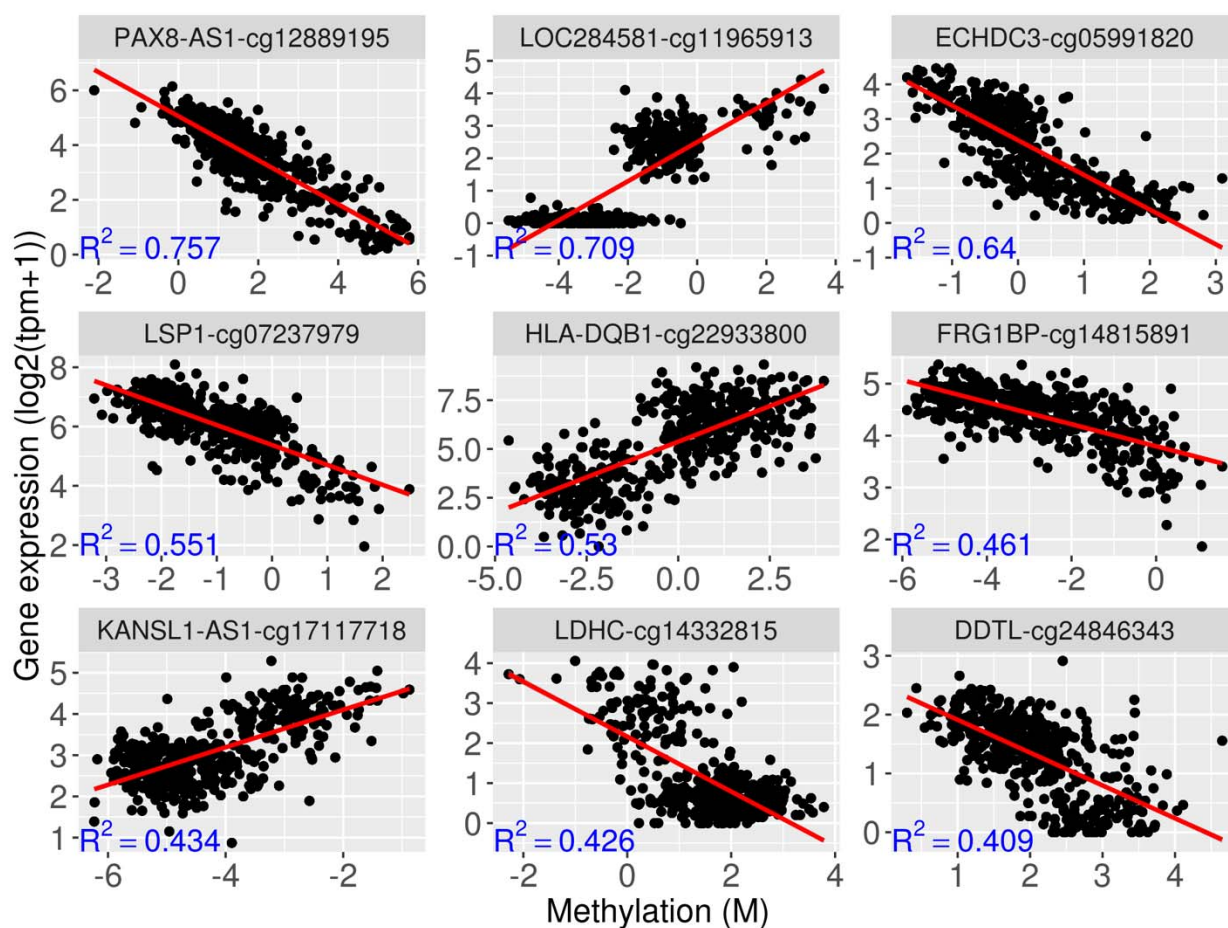

**Figure 2. Examples of the most significantly correlated gene-methylation pairs.**  $R^2$  is squared Pearson's correlation between methylation and gene expression. For each gene, only the most significantly associated CpG probe is plotted.

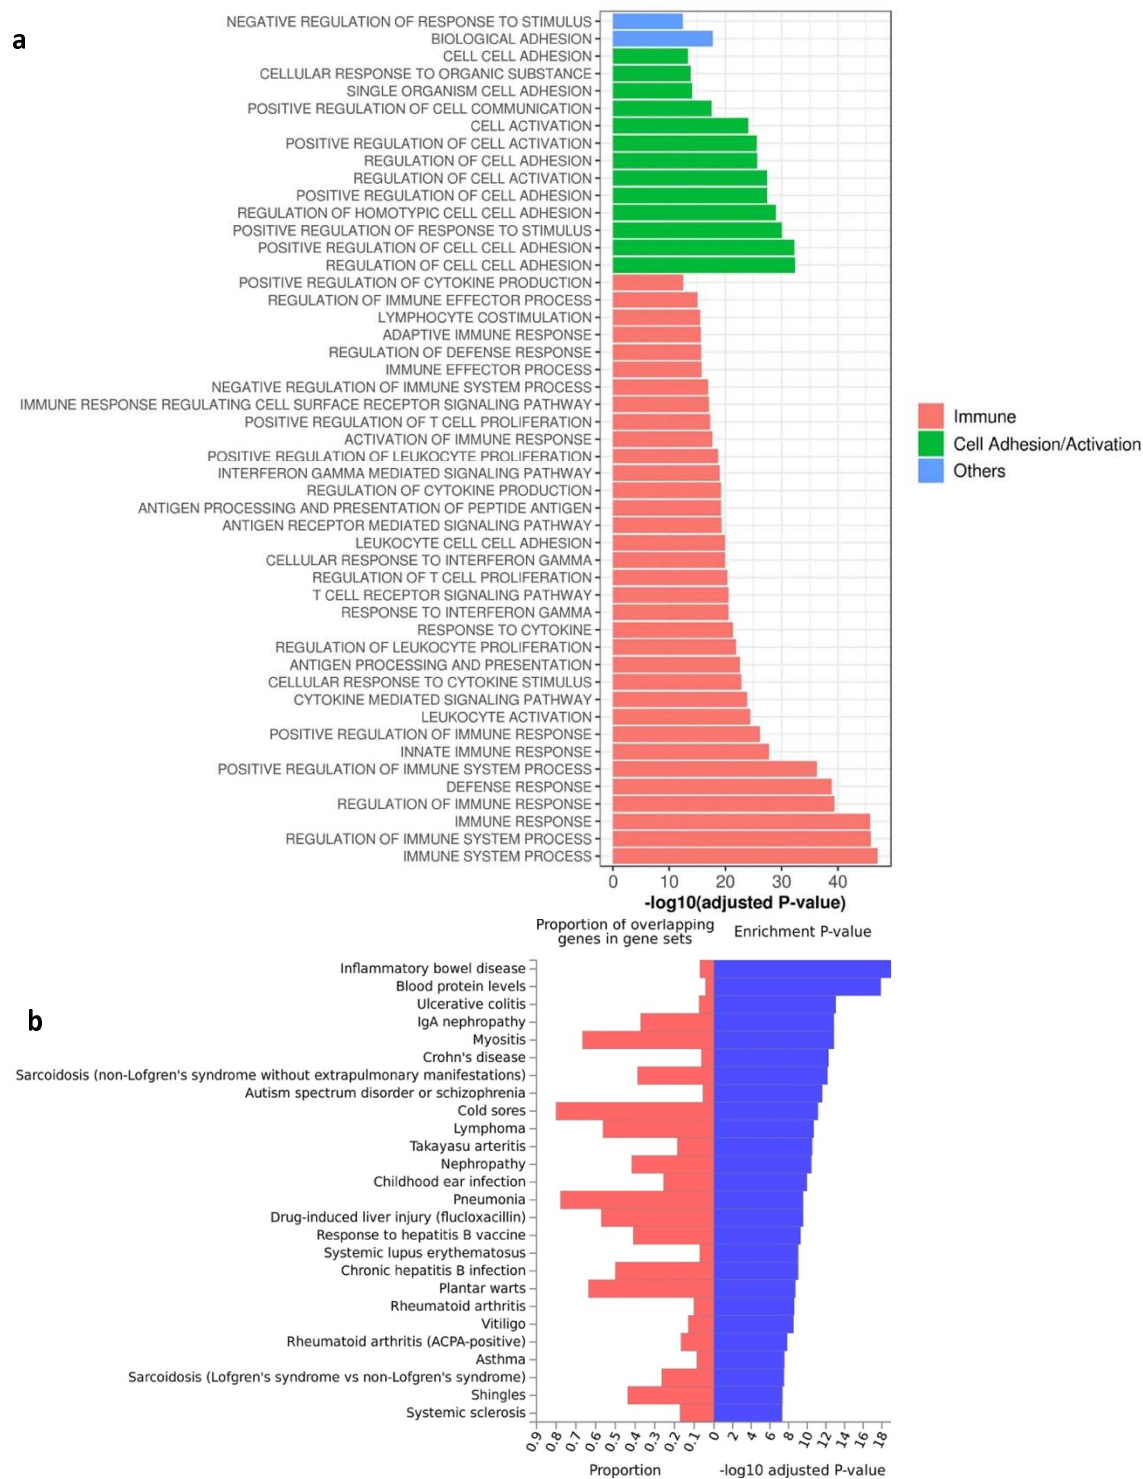

**Figure 3. Enrichment of the top 500 eQTM genes in immune pathways/diseases. a** Gene ontology (GO) biological processes identified for the top 500 eQTM genes. **b** Enrichment of top 500 eQTM genes among reported genes in GWAS catalog by disease. Both analyses were done through FUMA webpage<sup>30</sup>.

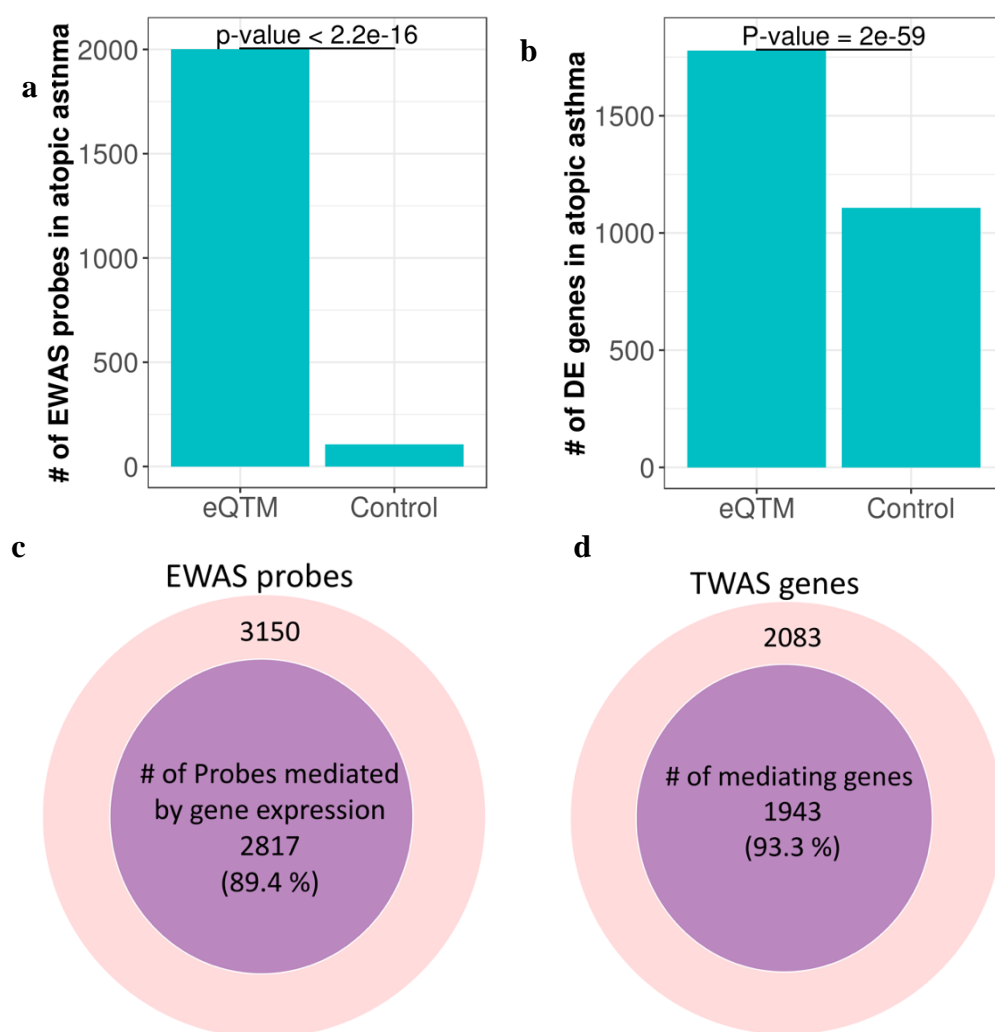

**Figure 4. Association of eQTM methylation probes and eQTM genes with atopic asthma. a.** Enrichment of eQTM methylation probes in epigenome-wide association studies (EWAS) of atopic asthma (genome-wide FDR-P < 0.01). eQTM refers to eQTM probes and control refers to the same number of randomly selected probes. **b.** Enrichment of eQTM genes in differentially expressed genes (DEG) in atopic asthma. DEG were identified in our previous study of EVA-PR (genome-wide FDR < 0.01)<sup>11</sup>. eQTM refers to eQTM genes and control refers to the same number of randomly selected genes. **c.** A majority (89.4%) of the associations between eQTM probes and atopic asthma are mediated by gene expression. **d.** A majority of (98.3%) of the genes associated with asthma mediate the association between methylation and atopic asthma.

**Table 1. Top 30 eQTM methylation CpGs that are located in enhancer region of their target genes in lung tissue.**

| Chr | Probe ID   | Position  | Gene ID         | TSS <sup>a</sup> | eQTM p-value          | Distance From TSS |
|-----|------------|-----------|-----------------|------------------|-----------------------|-------------------|
| 16  | cg26259865 | 2880359   | <i>ZG16B</i>    | 2880172          | 6.6x10 <sup>-33</sup> | 187               |
| 3   | cg22012981 | 58522689  | <i>ACOX2</i>    | 58522929         | 3.2x10 <sup>-31</sup> | -240              |
| 3   | cg16209444 | 58522771  | <i>ACOX2</i>    | 58522929         | 4.5x10 <sup>-25</sup> | -158              |
| 11  | cg15453278 | 67134607  | <i>TBC1D10C</i> | 67171383         | 1.1x10 <sup>-22</sup> | -36776            |
| 11  | cg21862992 | 68658383  | <i>MRPL21</i>   | 68671303         | 8.6x10 <sup>-21</sup> | -12920            |
| 11  | cg15453278 | 67134607  | <i>PTPRCAP</i>  | 67205153         | 8.2x10 <sup>-17</sup> | -70546            |
| 6   | cg25045942 | 33048291  | <i>HLA-DPA1</i> | 33041454         | 3.9x10 <sup>-15</sup> | 6837              |
| 6   | cg19053046 | 33048254  | <i>HLA-DPA1</i> | 33041454         | 6.8x10 <sup>-15</sup> | 6800              |
| 15  | cg10474377 | 42131658  | <i>JMJD7</i>    | 42120282         | 2.1x10 <sup>-14</sup> | 11376             |
| 17  | cg04204452 | 1479213   | <i>SERPINF2</i> | 1646129          | 5.1x10 <sup>-14</sup> | -166916           |
| 11  | cg21920570 | 63766787  | <i>FERMT3</i>   | 63974151         | 1.7x10 <sup>-13</sup> | -207364           |
| 11  | cg15995296 | 67210812  | <i>TBC1D10C</i> | 67171383         | 1.5x10 <sup>-12</sup> | 39429             |
| 17  | cg04204452 | 1479213   | <i>SERPINF1</i> | 1665218          | 1.5x10 <sup>-12</sup> | -186005           |
| 15  | cg17163752 | 34729026  | <i>GOLGA8B</i>  | 34875771         | 2.8x10 <sup>-12</sup> | -146745           |
| 12  | cg21163444 | 54765670  | <i>NCKAP1L</i>  | 54891494         | 1.3x10 <sup>-11</sup> | -125824           |
| 11  | cg10161008 | 63766546  | <i>FERMT3</i>   | 63974151         | 3.0x10 <sup>-11</sup> | -207605           |
| 6   | cg17071868 | 33047056  | <i>HLA-DOA</i>  | 32977389         | 1.3x10 <sup>-10</sup> | 69667             |
| 11  | cg21920570 | 63766787  | <i>CCDC88B</i>  | 64107689         | 3.2x10 <sup>-10</sup> | -340902           |
| 3   | cg16209444 | 58522771  | <i>KCTD6</i>    | 58477822         | 1.0x10 <sup>-9</sup>  | 44949             |
| 8   | cg20567768 | 22082066  | <i>SLC39A14</i> | 22224761         | 1.3x10 <sup>-9</sup>  | -142695           |
| 12  | cg22824738 | 54765988  | <i>NCKAP1L</i>  | 54891494         | 2.9x10 <sup>-9</sup>  | -125506           |
| 11  | cg15995296 | 67210812  | <i>PTPRCAP</i>  | 67205153         | 4.3x10 <sup>-9</sup>  | 5659              |
| 6   | cg17071868 | 33047056  | <i>HLA-DPB1</i> | 33043702         | 8.9x10 <sup>-9</sup>  | 3354              |
| 17  | cg01780984 | 79058859  | <i>BAIAP2</i>   | 79008946         | 1.4x10 <sup>-8</sup>  | 49913             |
| 6   | cg19053046 | 33048254  | <i>HLA-DPB1</i> | 33043702         | 1.7x10 <sup>-8</sup>  | 4552              |
| 11  | cg10161008 | 63766546  | <i>CCDC88B</i>  | 64107689         | 1.8x10 <sup>-8</sup>  | -341143           |
| 5   | cg23097826 | 149828748 | <i>RPS14</i>    | 149829319        | 2.5x10 <sup>-8</sup>  | -571              |
| 19  | cg25264268 | 427263    | <i>SHC2</i>     | 460996           | 2.5x10 <sup>-8</sup>  | -33733            |
| 12  | cg11700959 | 7066664   | <i>LAG3</i>     | 6881669          | 3.0x10 <sup>-8</sup>  | 184995            |
| 12  | cg11700959 | 7066664   | <i>CD4</i>      | 6898637          | 3.0x10 <sup>-8</sup>  | 168027            |

The eQTM analysis was conducted in nasal airway epithelium, and the enhancer regions and their target genes were identified in lung tissue (<http://www.enhanceratlas.org>)<sup>20</sup>. A total of 81 eQTM CpGs that are located in enhancer regions of their target genes were found. <sup>a</sup> TSS is the transcription start site of the gene.

**Table 2. Top 30 eQTM methylation probes identified in a previous epigenome-wide association study (EWAS) of atopic asthma<sup>2</sup>**

| probe      | chr | position  | EWAS P-value          | Associated Genes identified by eQTM (FDR < 0.01)                                     | Nearest Gene     |
|------------|-----|-----------|-----------------------|--------------------------------------------------------------------------------------|------------------|
| cg08844313 | 5   | 149240529 | 1.2x10 <sup>-16</sup> | <i>CD74, SLC26A2, DCTN4, AFAP1L1, GRPEL2</i>                                         | <i>PDE6A</i>     |
| cg20372759 | 12  | 58162287  | 1.2x10 <sup>-16</sup> | <i>MBD6, CYP27B1, AGAP2-AS1, MARCH9, TSFM, ATP23, MYO1A</i>                          | <i>METTL1</i>    |
| cg07239613 | 16  | 67051005  | 2.3x10 <sup>-16</sup> | <i>PSMB10, FBXL8, HSF4, NOL3, CMTM4, PSKH1, TRADD, CKLF</i>                          | <i>CES4A</i>     |
| cg15006973 | 1   | 35258933  | 3.2x10 <sup>-16</sup> | <i>TMEM35B, GJB4, PSMB2, KIAA0319L, SFPQ, LOC653160</i>                              | <i>GJA4</i>      |
| cg10549071 | 2   | 235160451 | 4.0x10 <sup>-16</sup> | <i>DGKD, UGT1A1, UGT1A4, UGT1A5, UGT1A3, SCARNA5</i>                                 | <i>SPP2</i>      |
| cg00406211 | 10  | 121077022 | 5.6x10 <sup>-16</sup> | <b><i>GRK5</i></b> , <i>FAM204A, PRDX3, MCMBP</i>                                    | <i>GRK5</i>      |
| cg00664723 | 5   | 15927184  | 5.7x10 <sup>-16</sup> | <b><i>FBXL7</i></b>                                                                  | <i>FBXL7</i>     |
| cg03875819 | 10  | 4386802   | 6.6x10 <sup>-16</sup> | <i>AKR1C3</i>                                                                        | <i>LINC00704</i> |
| cg21158502 | 5   | 74348187  | 8.6x10 <sup>-16</sup> | <i>GCNT4, LINC01336, GFM2, ENC1, NSA2, FAM169A, POC5</i>                             | <i>ANKRD31</i>   |
| cg13586696 | 22  | 29458723  | 1.1x10 <sup>-15</sup> | <i>XBP1, KREMEN1, GAS2L1, RHBDD3</i>                                                 | <i>C22orf31</i>  |
| cg20790648 | 3   | 151619923 | 1.6x10 <sup>-15</sup> | <i>GPR171, MBNL1, AADAC, P2RY13, P2RY1</i>                                           | <i>SUCNR1</i>    |
| cg24707200 | 1   | 156833163 | 2.3x10 <sup>-15</sup> | <i>SEMA4A, MEF2D, CCT3, ISG20L2, LAMTOR2, SLC25A44, RRNAD1, SMG5, UBQLN4, MRPL24</i> | <i>NTRK1</i>     |
| cg01859321 | 8   | 144970195 | 2.5x10 <sup>-15</sup> | <i>MROH6, SLC52A2, SCRIB, DGAT1, ZNF707, MROH1, FBXL6, PLEC, ADCK5</i>               | <i>PLEC</i>      |
| cg01870976 | 15  | 101887154 | 3.2x10 <sup>-15</sup> | <b><i>PCSK6</i></b> , <i>ALDH1A3, LRRK1, TM2D3</i>                                   | <i>PCSK6</i>     |
| cg00285620 | 11  | 102147694 | 4.9x10 <sup>-15</sup> | <i>DYNC2H1, TMEM123, MMP10</i>                                                       | <i>BIRC3</i>     |
| cg04132353 | 2   | 31440349  | 6.0x10 <sup>-15</sup> | <b><i>CAPN14</i></b> , <i>DPY30, LBH, XDH</i>                                        | <i>CAPN14</i>    |
| cg06675531 | 5   | 150019123 | 6.4x10 <sup>-15</sup> | <i>ZNF300, SLC26A2, DCTN4, <b>SYNPO</b></i>                                          | <i>SYNPO</i>     |
| cg22855021 | 14  | 81610812  | 7.5x10 <sup>-15</sup> | <i>GTF2A1</i>                                                                        | <i>TSHR</i>      |
| cg09472600 | 1   | 183537770 | 9.3x10 <sup>-15</sup> | <i>NPL, DHX9, TSEN15, APOBEC4</i>                                                    | <i>NCF2</i>      |
| cg19107578 | 5   | 493262    | 1.2x10 <sup>-14</sup> | <b><i>SLC9A3</i></b> , <i>PP7080, CEP72, LOC100288152</i>                            | <i>SLC9A3</i>    |
| cg18749617 | 15  | 102028637 | 1.2x10 <sup>-14</sup> | <b><i>PCSK6</i></b> , <i>ALDH1A3, LRRK1</i>                                          | <i>PCSK6</i>     |
| cg10830021 | 11  | 3815589   | 1.3x10 <sup>-14</sup> | <i>RRM1, TRIM21, TSSC2</i>                                                           | <i>NUP98</i>     |
| cg03387497 | 20  | 17680945  | 1.5x10 <sup>-14</sup> | <i>POLR3F, SNRPB2, LINC00493, RRBP1, RBBP9</i>                                       | <i>BANF2</i>     |
| cg20337028 | 17  | 75181836  | 1.8x10 <sup>-14</sup> | <b><i>SEC14L1</i></b> , <i>SYNGR2, UBALD2, SEPT9, SPHK1, TNRC6C</i>                  | <i>SEC14L1</i>   |
| cg17223698 | 15  | 39416631  | 2.0x10 <sup>-14</sup> | <i>SRP14</i>                                                                         | <i>C15orf54</i>  |
| cg19497511 | 2   | 238609807 | 2.7x10 <sup>-14</sup> | <i>COPS8</i>                                                                         | <i>LRRFIP1</i>   |
| cg08175352 | 3   | 101894206 | 3.2x10 <sup>-14</sup> | <i>ZBTB11, TRMT10C, NXPE3, SENP7, RPL24, PCNP</i>                                    | <i>ZPLD1</i>     |
| cg02333649 | 22  | 19471093  | 5.5x10 <sup>-14</sup> | <i>RTN4R, ARVCF, MRPL40, PRODH, LINC00896, UFD1L, TANGO2, DGCR8, ZDHHC8</i>          | <i>CDC45</i>     |
| cg08956463 | 6   | 41168911  | 5.9x10 <sup>-14</sup> | <i>MDFI, TREM2, FOXP4, C6orf132, UNC5CL</i>                                          | <i>TREML2</i>    |
| cg04320956 | 16  | 69143512  | 6.3x10 <sup>-14</sup> | <b><i>HAS3</i></b> , <i>ZFP90, NQO1, NIP7, SLC7A6, CDH3, ESRP2</i>                   | <i>HAS3</i>      |

Probes sorted by EWAS p-value. Genes shown in bold are the nearest gene.

**Table 3. Top 30 eQTM genes identified in a previous transcriptome-wide association study (TWAS) of atopic asthma<sup>11</sup>.**

| Gene             | Chr | TWAS p-value          | # of associated probes | probe      | position  | eQTM p-value          |
|------------------|-----|-----------------------|------------------------|------------|-----------|-----------------------|
| <i>CST1</i>      | 20  | 1.1x10 <sup>-64</sup> | 1                      | cg14928764 | 23064608  | 5.5x10 <sup>-10</sup> |
| <i>CLCA1</i>     | 1   | 1.4x10 <sup>-47</sup> | 5                      | cg22175412 | 86063985  | 9.7x10 <sup>-15</sup> |
| <i>NTRK2</i>     | 9   | 4.3x10 <sup>-44</sup> | 2                      | cg09926027 | 87285693  | 1.5x10 <sup>-18</sup> |
| <i>FETUB</i>     | 3   | 7.5x10 <sup>-42</sup> | 5                      | cg25735294 | 186353721 | 2.6x10 <sup>-18</sup> |
| <i>CPA3</i>      | 3   | 3.4x10 <sup>-39</sup> | 5                      | cg13235059 | 149192304 | 3.1x10 <sup>-15</sup> |
| <i>ITLN1</i>     | 1   | 8.7x10 <sup>-38</sup> | 10                     | cg10094191 | 160855148 | 6.3x10 <sup>-9</sup>  |
| <i>CDH26</i>     | 20  | 8.6x10 <sup>-37</sup> | 7                      | cg06943251 | 57615398  | 2.1x10 <sup>-18</sup> |
| <i>CCL26</i>     | 7   | 2.2x10 <sup>-35</sup> | 5                      | cg13053914 | 75511260  | 1.4x10 <sup>-8</sup>  |
| <i>CST2</i>      | 20  | 4.0x10 <sup>-35</sup> | 1                      | cg14928764 | 23064608  | 3.2x10 <sup>-10</sup> |
| <i>C3orf70</i>   | 3   | 8.3x10 <sup>-35</sup> | 9                      | cg01390445 | 185271312 | 1.6x10 <sup>-13</sup> |
| <i>TPSAB1</i>    | 16  | 3.3x10 <sup>-34</sup> | 26                     | cg00943124 | 1705667   | 3.9x10 <sup>-14</sup> |
| <i>CISH</i>      | 3   | 3.0x10 <sup>-32</sup> | 9                      | cg23005227 | 50645426  | 8.4x10 <sup>-24</sup> |
| <i>TPSB2</i>     | 16  | 8.0x10 <sup>-30</sup> | 20                     | cg00943124 | 1705667   | 4.3x10 <sup>-13</sup> |
| <i>ALOX15</i>    | 17  | 3.4x10 <sup>-29</sup> | 11                     | cg23387401 | 4582204   | 9.7x10 <sup>-24</sup> |
| <i>CEP72</i>     | 5   | 1.3x10 <sup>-28</sup> | 42                     | cg04221910 | 616842    | 5.1x10 <sup>-21</sup> |
| <i>SLC5A5</i>    | 19  | 5.5x10 <sup>-28</sup> | 10                     | cg15734198 | 17423023  | 1.7x10 <sup>-12</sup> |
| <i>POSTN</i>     | 13  | 7.7x10 <sup>-28</sup> | 4                      | cg03071245 | 37463034  | 1.7x10 <sup>-9</sup>  |
| <i>HS3ST4</i>    | 16  | 5.2x10 <sup>-27</sup> | 4                      | cg26725397 | 25937266  | 6.2x10 <sup>-15</sup> |
| <i>PCSK6</i>     | 15  | 1.4x10 <sup>-26</sup> | 11                     | cg18749617 | 102028637 | 1.4x10 <sup>-27</sup> |
| <i>WBSCR17</i>   | 7   | 2.5x10 <sup>-26</sup> | 3                      | cg01349903 | 71148142  | 5.4x10 <sup>-12</sup> |
| <i>KYAT1</i>     | 9   | 2.8x10 <sup>-26</sup> | 12                     | cg13835688 | 130859454 | 1.6x10 <sup>-16</sup> |
| <i>ANO1</i>      | 11  | 5.1x10 <sup>-26</sup> | 7                      | cg11058904 | 69987299  | 1.3x10 <sup>-15</sup> |
| <i>ABO</i>       | 9   | 3.0x10 <sup>-25</sup> | 6                      | cg11879188 | 136149908 | 7.4x10 <sup>-18</sup> |
| <i>CMYA5</i>     | 5   | 4.5x10 <sup>-25</sup> | 1                      | cg14978242 | 79501131  | 1.2x10 <sup>-7</sup>  |
| <i>SLC24A3</i>   | 20  | 1.3x10 <sup>-23</sup> | 3                      | cg08371391 | 19739935  | 3.0x10 <sup>-8</sup>  |
| <i>GCNT4</i>     | 5   | 1.1x10 <sup>-22</sup> | 2                      | cg21158502 | 74348187  | 2.0x10 <sup>-30</sup> |
| <i>SLC7A1</i>    | 13  | 1.6x10 <sup>-22</sup> | 3                      | cg17798847 | 30098432  | 8.3x10 <sup>-7</sup>  |
| <i>SLC45A4</i>   | 8   | 1.8x10 <sup>-22</sup> | 7                      | cg07140289 | 142299684 | 1.8x10 <sup>-11</sup> |
| <i>DQX1</i>      | 2   | 6.9x10 <sup>-22</sup> | 9                      | cg02034222 | 74753281  | 4.4x10 <sup>-17</sup> |
| <i>GSN</i>       | 9   | 9.4x10 <sup>-22</sup> | 6                      | cg13928417 | 124498782 | 2.7x10 <sup>-9</sup>  |
| <i>KCNJ16</i>    | 17  | 2.3x10 <sup>-21</sup> | 2                      | cg13606025 | 68070495  | 7.8x10 <sup>-10</sup> |
| <i>LINC01336</i> | 5   | 7.7x10 <sup>-21</sup> | 2                      | cg21158502 | 74348187  | 1.6x10 <sup>-16</sup> |
| <i>ZNF467</i>    | 7   | 2.2x10 <sup>-20</sup> | 8                      | cg07970948 | 149543165 | 3.3x10 <sup>-19</sup> |
| <i>RUSC1</i>     | 1   | 3.7x10 <sup>-20</sup> | 15                     | cg23154272 | 154966068 | 2.3x10 <sup>-16</sup> |
| <i>DHX35</i>     | 20  | 4.7x10 <sup>-20</sup> | 1                      | cg26604799 | 36789861  | 2.5x10 <sup>-5</sup>  |
| <i>DPP4</i>      | 2   | 8.1x10 <sup>-20</sup> | 3                      | cg22143064 | 162948592 | 5.9x10 <sup>-27</sup> |

|                     |    |                       |    |            |           |                       |
|---------------------|----|-----------------------|----|------------|-----------|-----------------------|
| <i>SOX13</i>        | 1  | $8.4 \times 10^{-20}$ | 3  | cg17000774 | 203154457 | $1.3 \times 10^{-8}$  |
| <i>SLC18A2</i>      | 10 | $1.1 \times 10^{-19}$ | 2  | cg03519180 | 119102524 | $1.2 \times 10^{-6}$  |
| <i>ST6GAL1</i>      | 3  | $1.6 \times 10^{-19}$ | 6  | cg25735294 | 186353721 | $1.1 \times 10^{-20}$ |
| <i>C20orf197</i>    | 20 | $3.8 \times 10^{-19}$ | 2  | cg16518142 | 58533713  | $3.9 \times 10^{-8}$  |
| <i>CA2</i>          | 8  | $1.1 \times 10^{-18}$ | 1  | cg05071334 | 86195487  | $1.1 \times 10^{-5}$  |
| <i>NPDC1</i>        | 9  | $2.3 \times 10^{-18}$ | 8  | cg13850871 | 139583773 | $2.6 \times 10^{-11}$ |
| <i>RTN4R</i>        | 22 | $3.2 \times 10^{-18}$ | 3  | cg02333649 | 19471093  | $2.0 \times 10^{-22}$ |
| <i>FGF11</i>        | 17 | $3.2 \times 10^{-18}$ | 12 | cg22637538 | 7348327   | $3.1 \times 10^{-11}$ |
| <i>LOC100288152</i> | 5  | $5.0 \times 10^{-18}$ | 15 | cg22572362 | 501938    | $1.6 \times 10^{-8}$  |
| <i>ELOVL5</i>       | 6  | $5.8 \times 10^{-18}$ | 1  | cg26516974 | 52475065  | $3.5 \times 10^{-9}$  |
| <i>CMIP</i>         | 16 | $1.0 \times 10^{-17}$ | 1  | cg16583186 | 81526361  | $6.7 \times 10^{-6}$  |
| <i>ADAMTS9</i>      | 3  | $1.4 \times 10^{-17}$ | 11 | cg08765100 | 64211659  | $1.4 \times 10^{-11}$ |
| <i>CCK</i>          | 3  | $1.8 \times 10^{-17}$ | 2  | cg07886398 | 42131702  | $1.0 \times 10^{-8}$  |

Significance for both differential expression and differential methylation defined as FDR- $P < 0.01$ . Genes shown sorted by TWAS p-value. Only the most significantly associated probe per gene is presented.

**Table 4. Top 30 mediation paths from methylation to gene expression to atopic asthma.**

| chr | probe      | pos       | gene             | TSS       | eQTM<br>p-value       | EWAS<br>p-value       | TWAS<br>p-value       |
|-----|------------|-----------|------------------|-----------|-----------------------|-----------------------|-----------------------|
| 20  | cg14928764 | 23064608  | <i>CST1</i>      | 23731574  | $5.5 \times 10^{-10}$ | $6.0 \times 10^{-4}$  | $3.2 \times 10^{-15}$ |
| 3   | cg01390445 | 185271312 | <i>C3orf70</i>   | 184870802 | $1.5 \times 10^{-13}$ | $9.6 \times 10^{-8}$  | $7.0 \times 10^{-13}$ |
| 5   | cg14978242 | 79501131  | <i>CMYA5</i>     | 78985658  | $1.2 \times 10^{-7}$  | $2.0 \times 10^{-7}$  | $1.4 \times 10^{-12}$ |
| 16  | cg00943124 | 1705667   | <i>TPSAB1</i>    | 1290677   | $3.9 \times 10^{-14}$ | $9.0 \times 10^{-9}$  | $3.3 \times 10^{-12}$ |
| 16  | cg26725397 | 25937266  | <i>HS3ST4</i>    | 25703346  | $6.2 \times 10^{-15}$ | $6.6 \times 10^{-8}$  | $6.2 \times 10^{-12}$ |
| 17  | cg23387401 | 4582204   | <i>ALOX15</i>    | 4544960   | $9.7 \times 10^{-24}$ | $2.1 \times 10^{-13}$ | $6.8 \times 10^{-12}$ |
| 11  | cg11058904 | 69987299  | <i>ANO1</i>      | 69924407  | $1.3 \times 10^{-15}$ | $3.9 \times 10^{-13}$ | $6.8 \times 10^{-12}$ |
| 7   | cg11303839 | 75405967  | <i>CCL26</i>     | 75419064  | $7.3 \times 10^{-7}$  | $1.1 \times 10^{-7}$  | $8.9 \times 10^{-12}$ |
| 5   | cg21158502 | 74348187  | <i>GCNT4</i>     | 74326724  | $2.0 \times 10^{-30}$ | $8.5 \times 10^{-16}$ | $1.1 \times 10^{-11}$ |
| 9   | cg04236137 | 123655887 | <i>GSN</i>       | 124030379 | $3.7 \times 10^{-8}$  | $8.8 \times 10^{-4}$  | $1.4 \times 10^{-11}$ |
| 5   | cg21158502 | 74348187  | <i>LINC01336</i> | 74348468  | $1.6 \times 10^{-16}$ | $8.5 \times 10^{-16}$ | $1.5 \times 10^{-11}$ |
| 15  | cg18749617 | 102028637 | <i>PCSK6</i>     | 102030187 | $1.4 \times 10^{-27}$ | $1.1 \times 10^{-14}$ | $1.6 \times 10^{-11}$ |
| 3   | cg13235059 | 149192304 | <i>CPA3</i>      | 148583042 | $3.0 \times 10^{-15}$ | $1.7 \times 10^{-8}$  | $1.8 \times 10^{-11}$ |
| 20  | cg14928764 | 23064608  | <i>CST2</i>      | 23807312  | $3.2 \times 10^{-10}$ | $6.0 \times 10^{-4}$  | $1.9 \times 10^{-11}$ |
| 5   | cg01181940 | 478916    | <i>CEP72</i>     | 612404    | $1.6 \times 10^{-20}$ | $2.2 \times 10^{-11}$ | $2.8 \times 10^{-11}$ |
| 9   | cg09926027 | 87285693  | <i>NTRK2</i>     | 87283372  | $1.5 \times 10^{-18}$ | $4.5 \times 10^{-12}$ | $3.2 \times 10^{-11}$ |
| 1   | cg23154272 | 154966068 | <i>RUSC1</i>     | 155290639 | $2.2 \times 10^{-16}$ | $2.0 \times 10^{-8}$  | $3.4 \times 10^{-11}$ |
| 9   | cg11879188 | 136149908 | <i>ABO</i>       | 136150630 | $7.3 \times 10^{-18}$ | $1.9 \times 10^{-7}$  | $3.8 \times 10^{-11}$ |
| 3   | cg23005227 | 50645426  | <i>CISH</i>      | 50649262  | $8.3 \times 10^{-24}$ | $4.0 \times 10^{-12}$ | $3.8 \times 10^{-11}$ |
| 6   | cg14178895 | 11778902  | <i>ADTRP</i>     | 11779280  | $6.8 \times 10^{-23}$ | $3.6 \times 10^{-8}$  | $4.0 \times 10^{-11}$ |
| 3   | cg25735294 | 186353721 | <i>ST6GAL1</i>   | 186648314 | $1.0 \times 10^{-20}$ | $3.3 \times 10^{-10}$ | $5.2 \times 10^{-11}$ |
| 8   | cg07140289 | 142299684 | <i>SLC45A4</i>   | 142238673 | $1.8 \times 10^{-11}$ | $2.4 \times 10^{-4}$  | $6.3 \times 10^{-11}$ |
| 2   | cg04132353 | 31440349  | <i>CAPN14</i>    | 31440411  | $4.6 \times 10^{-20}$ | $5.9 \times 10^{-15}$ | $6.4 \times 10^{-11}$ |
| 5   | cg14978242 | 79501131  | <i>SERINC5</i>   | 79551901  | $1.3 \times 10^{-9}$  | $2.0 \times 10^{-7}$  | $7.7 \times 10^{-11}$ |
| 1   | cg03058346 | 91275170  | <i>LRRC8D</i>    | 90286572  | $1.4 \times 10^{-6}$  | $6.9 \times 10^{-4}$  | $8.4 \times 10^{-11}$ |
| 1   | cg01062020 | 162382848 | <i>SH2D1B</i>    | 162381928 | $1.7 \times 10^{-6}$  | $2.0 \times 10^{-6}$  | $9.8 \times 10^{-11}$ |
| 20  | cg26604799 | 36789861  | <i>DHX35</i>     | 37590980  | $2.5 \times 10^{-5}$  | $2.5 \times 10^{-3}$  | $1.0 \times 10^{-10}$ |
| 16  | cg00943124 | 1705667   | <i>TPSB2</i>     | 1280185   | $4.2 \times 10^{-13}$ | $9.0 \times 10^{-9}$  | $1.1 \times 10^{-10}$ |
| 2   | cg22143064 | 162948592 | <i>DPP4</i>      | 162931052 | $5.8 \times 10^{-27}$ | $5.2 \times 10^{-8}$  | $1.5 \times 10^{-10}$ |
| 15  | cg09407660 | 59910436  | <i>GCNT3</i>     | 59903981  | $1.3 \times 10^{-19}$ | $9.8 \times 10^{-10}$ | $1.5 \times 10^{-10}$ |

Results sorted by TWAS p-value<sup>11</sup>. Total of 5394 mediation paths were identified. Only one mediation path was presented per gene. Mediation analysis was conducted using Baron and Kenny (1986).



**Table 5. Top 30 most significant eQTM methylation-gene pairs in EVA-PR cohort that replicated in GSE65205**

| Associated pairs |                   | EVA-PR |                       |                       | GSE65205 |                       |                       |
|------------------|-------------------|--------|-----------------------|-----------------------|----------|-----------------------|-----------------------|
| probe            | gene              | beta   | p-value               | FDR                   | beta     | p-value               | FDR                   |
| cg05991820       | <i>ECHDC3</i>     | -1     | 5.1x10 <sup>-98</sup> | 7.2x10 <sup>-92</sup> | -0.31    | 3.9x10 <sup>-3</sup>  | 1.2x10 <sup>-2</sup>  |
| cg22933800       | <i>HLA-DQB1</i>   | 0.75   | 1.7x10 <sup>-76</sup> | 1.2x10 <sup>-70</sup> | 1        | 7.9x10 <sup>-20</sup> | 5.7x10 <sup>-16</sup> |
| cg07237979       | <i>LSP1</i>       | -0.67  | 4.6x10 <sup>-69</sup> | 3.0x10 <sup>-63</sup> | -0.57    | 2.4x10 <sup>-12</sup> | 4.9x10 <sup>-10</sup> |
| cg14332815       | <i>LDHC</i>       | -0.71  | 1.3x10 <sup>-56</sup> | 4.0x10 <sup>-51</sup> | -1.1     | 1.5x10 <sup>-18</sup> | 5.3x10 <sup>-15</sup> |
| cg10296238       | <i>SPATC1L</i>    | -0.31  | 1.1x10 <sup>-51</sup> | 2.5x10 <sup>-46</sup> | -0.23    | 2.4x10 <sup>-10</sup> | 1.7x10 <sup>-8</sup>  |
| cg17117718       | <i>CRHR1-IT1</i>  | 0.29   | 4.0x10 <sup>-51</sup> | 8.6x10 <sup>-46</sup> | 0.35     | 5.2x10 <sup>-8</sup>  | 1.2x10 <sup>-6</sup>  |
| cg16145915       | <i>ZFAND2A</i>    | 0.48   | 2.6x10 <sup>-50</sup> | 5.1x10 <sup>-45</sup> | 0.53     | 1.1x10 <sup>-4</sup>  | 6.0x10 <sup>-4</sup>  |
| cg10626236       | <i>CDK11A</i>     | 0.59   | 3.2x10 <sup>-50</sup> | 6.2x10 <sup>-45</sup> | 0.39     | 1.0x10 <sup>-2</sup>  | 2.5x10 <sup>-2</sup>  |
| cg03190825       | <i>CYP4F11</i>    | -1.3   | 2.5x10 <sup>-48</sup> | 4.5x10 <sup>-43</sup> | -0.41    | 6.7x10 <sup>-3</sup>  | 1.8x10 <sup>-2</sup>  |
| cg22092521       | <i>CFD</i>        | -0.83  | 1.7x10 <sup>-45</sup> | 2.6x10 <sup>-40</sup> | -1.2     | 1.2x10 <sup>-6</sup>  | 1.4x10 <sup>-5</sup>  |
| cg11375102       | <i>TMEM204</i>    | -0.68  | 1.3x10 <sup>-44</sup> | 1.9x10 <sup>-39</sup> | -1       | 1.7x10 <sup>-14</sup> | 1.2x10 <sup>-11</sup> |
| cg24977027       | <i>THNSL2</i>     | -0.78  | 5.6x10 <sup>-44</sup> | 8.0x10 <sup>-39</sup> | -1.2     | 4.6x10 <sup>-13</sup> | 1.3x10 <sup>-10</sup> |
| cg05461841       | <i>ZG16B</i>      | -0.66  | 2.0x10 <sup>-42</sup> | 2.6x10 <sup>-37</sup> | -0.71    | 1.4x10 <sup>-4</sup>  | 7.2x10 <sup>-4</sup>  |
| cg06851207       | <i>PNMAL1</i>     | -0.79  | 2.1x10 <sup>-42</sup> | 2.7x10 <sup>-37</sup> | -0.89    | 3.0x10 <sup>-7</sup>  | 4.6x10 <sup>-6</sup>  |
| cg01878807       | <i>DHRS4-AS1</i>  | -0.42  | 4.3x10 <sup>-42</sup> | 5.4x10 <sup>-37</sup> | -0.34    | 1.3x10 <sup>-5</sup>  | 1.0x10 <sup>-4</sup>  |
| cg02926397       | <i>LY6D</i>       | -1.2   | 8.3x10 <sup>-42</sup> | 1.0x10 <sup>-36</sup> | -2.5     | 6.6x10 <sup>-10</sup> | 3.8x10 <sup>-8</sup>  |
| cg02719634       | <i>SLC22A18AS</i> | -0.28  | 5.8x10 <sup>-41</sup> | 6.6x10 <sup>-36</sup> | -0.41    | 3.0x10 <sup>-6</sup>  | 3.0x10 <sup>-5</sup>  |
| cg06846259       | <i>POMC</i>       | -0.5   | 5.9x10 <sup>-41</sup> | 6.6x10 <sup>-36</sup> | -1       | 1.2x10 <sup>-16</sup> | 2.4x10 <sup>-13</sup> |
| cg15176213       | <i>COX7A1</i>     | -0.85  | 6.3x10 <sup>-41</sup> | 6.9x10 <sup>-36</sup> | -1.3     | 2.4x10 <sup>-14</sup> | 1.7x10 <sup>-11</sup> |
| cg14815891       | <i>FRG1BP</i>     | -0.19  | 8.0x10 <sup>-41</sup> | 8.7x10 <sup>-36</sup> | -0.26    | 1.3x10 <sup>-4</sup>  | 7.0x10 <sup>-4</sup>  |
| cg24846343       | <i>GSTT2B</i>     | -0.79  | 4.2x10 <sup>-39</sup> | 4.2x10 <sup>-34</sup> | -1       | 1.1x10 <sup>-12</sup> | 2.6x10 <sup>-10</sup> |
| cg19059861       | <i>BPIFA1</i>     | -3.2   | 4.6x10 <sup>-37</sup> | 4.1x10 <sup>-32</sup> | -3.9     | 1.4x10 <sup>-8</sup>  | 4.1x10 <sup>-7</sup>  |
| cg22933800       | <i>HLA-DQA2</i>   | -0.49  | 9.0x10 <sup>-37</sup> | 7.8x10 <sup>-32</sup> | -0.18    | 1.7x10 <sup>-5</sup>  | 1.3x10 <sup>-4</sup>  |
| cg06322601       | <i>RASA4</i>      | 0.18   | 3.8x10 <sup>-35</sup> | 3.0x10 <sup>-30</sup> | 0.08     | 1.6x10 <sup>-2</sup>  | 3.7x10 <sup>-2</sup>  |
| cg05681977       | <i>SLC39A4</i>    | -0.37  | 6.4x10 <sup>-34</sup> | 4.7x10 <sup>-29</sup> | -0.64    | 9.1x10 <sup>-16</sup> | 1.4x10 <sup>-12</sup> |
| cg10207745       | <i>LINC01559</i>  | -0.86  | 7.3x10 <sup>-34</sup> | 5.2x10 <sup>-29</sup> | -0.52    | 3.0x10 <sup>-3</sup>  | 9.5x10 <sup>-3</sup>  |
| cg10807101       | <i>GSTM3</i>      | -0.43  | 3.4x10 <sup>-33</sup> | 2.3x10 <sup>-28</sup> | -0.68    | 4.9x10 <sup>-7</sup>  | 6.8x10 <sup>-6</sup>  |
| cg08450017       | <i>CXCR6</i>      | -0.46  | 2.0x10 <sup>-32</sup> | 1.3x10 <sup>-27</sup> | -0.59    | 2.4x10 <sup>-10</sup> | 1.7x10 <sup>-8</sup>  |
| cg01850135       | <i>NLRC3</i>      | -0.34  | 8.3x10 <sup>-32</sup> | 5.2x10 <sup>-27</sup> | -0.9     | 1.5x10 <sup>-11</sup> | 2.0x10 <sup>-9</sup>  |
| cg23161218       | <i>ACAP1</i>      | 0.31   | 1.2x10 <sup>-31</sup> | 7.5x10 <sup>-27</sup> | 0.29     | 2.1x10 <sup>-4</sup>  | 1.0x10 <sup>-3</sup>  |

Replication defined as FDR P<0.05 with effect in the same direction as in EVA-PR.

**Table 6. Top 30 most significant eQTM methylation-gene pairs in EVA-PR cohort that replicated in GSE65205. Only eQTM probes that are associated with atopic asthma in EVA-PR cohort (FDR-P < 0.05) are presented.**

| Associated pairs |                   | EVA-PR |                       |                       | GSE65205 |                       |                       | EWAS (EVA-PR)         |
|------------------|-------------------|--------|-----------------------|-----------------------|----------|-----------------------|-----------------------|-----------------------|
| probe            | gene              | beta   | p-value               | FDR                   | beta     | p-value               | FDR                   | FDR                   |
| cg04511125       | <i>THNSL2</i>     | -0.9   | 1.1x10 <sup>-36</sup> | 9.2x10 <sup>-32</sup> | -0.81    | 1.2x10 <sup>-6</sup>  | 1.4x10 <sup>-5</sup>  | 7.3x10 <sup>-3</sup>  |
| cg17252645       | <i>LY6D</i>       | -1     | 6.1x10 <sup>-36</sup> | 5.0x10 <sup>-31</sup> | -1.6     | 1.5x10 <sup>-8</sup>  | 4.4x10 <sup>-7</sup>  | 4.1x10 <sup>-2</sup>  |
| cg10807101       | <i>GSTM3</i>      | -0.43  | 3.4x10 <sup>-33</sup> | 2.3x10 <sup>-28</sup> | -0.68    | 4.9x10 <sup>-7</sup>  | 6.8x10 <sup>-6</sup>  | 7.6x10 <sup>-4</sup>  |
| cg08450017       | <i>CXCR6</i>      | -0.46  | 2.0x10 <sup>-32</sup> | 1.3x10 <sup>-27</sup> | -0.59    | 2.4x10 <sup>-10</sup> | 1.7x10 <sup>-8</sup>  | 2.6x10 <sup>-4</sup>  |
| cg01850135       | <i>NLRC3</i>      | -0.34  | 8.3x10 <sup>-32</sup> | 5.2x10 <sup>-27</sup> | -0.9     | 1.5x10 <sup>-11</sup> | 2.0x10 <sup>-9</sup>  | 5.6x10 <sup>-4</sup>  |
| cg23161218       | <i>ACAP1</i>      | 0.31   | 1.2x10 <sup>-31</sup> | 7.5x10 <sup>-27</sup> | 0.29     | 2.1x10 <sup>-4</sup>  | 1.0x10 <sup>-3</sup>  | 2.3x10 <sup>-3</sup>  |
| cg22012981       | <i>ACOX2</i>      | -0.86  | 3.2x10 <sup>-31</sup> | 1.9x10 <sup>-26</sup> | -0.35    | 1.1x10 <sup>-2</sup>  | 2.6x10 <sup>-2</sup>  | 3.3x10 <sup>-8</sup>  |
| cg07786657       | <i>CD247</i>      | -0.35  | 4.6x10 <sup>-31</sup> | 2.7x10 <sup>-26</sup> | -0.37    | 3.9x10 <sup>-9</sup>  | 1.5x10 <sup>-7</sup>  | 8.0x10 <sup>-4</sup>  |
| cg03546687       | <i>IL32</i>       | 0.59   | 2.4x10 <sup>-29</sup> | 1.3x10 <sup>-24</sup> | 0.75     | 5.0x10 <sup>-6</sup>  | 4.5x10 <sup>-5</sup>  | 3.1x10 <sup>-3</sup>  |
| cg14527029       | <i>HGD</i>        | -0.76  | 3.2x10 <sup>-29</sup> | 1.6x10 <sup>-24</sup> | -1.1     | 9.2x10 <sup>-8</sup>  | 1.8x10 <sup>-6</sup>  | 1.4x10 <sup>-7</sup>  |
| cg11453837       | <i>PSMB9</i>      | -0.98  | 3.3x10 <sup>-28</sup> | 1.6x10 <sup>-23</sup> | -0.78    | 6.0x10 <sup>-4</sup>  | 2.5x10 <sup>-3</sup>  | 1.7x10 <sup>-4</sup>  |
| cg27583010       | <i>SEPT1</i>      | -0.39  | 1.0x10 <sup>-27</sup> | 4.6x10 <sup>-23</sup> | -0.61    | 3.4x10 <sup>-9</sup>  | 1.3x10 <sup>-7</sup>  | 4.3x10 <sup>-2</sup>  |
| cg18749617       | <i>PCSK6</i>      | -0.38  | 1.4x10 <sup>-27</sup> | 6.3x10 <sup>-23</sup> | -0.22    | 1.1x10 <sup>-3</sup>  | 4.1x10 <sup>-3</sup>  | 1.2x10 <sup>-10</sup> |
| cg08450017       | <i>CCR5</i>       | -0.36  | 2.8x10 <sup>-27</sup> | 1.2x10 <sup>-22</sup> | -0.54    | 3.3x10 <sup>-9</sup>  | 1.3x10 <sup>-7</sup>  | 2.6x10 <sup>-4</sup>  |
| cg22143064       | <i>DPP4</i>       | -1.1   | 5.9x10 <sup>-27</sup> | 2.4x10 <sup>-22</sup> | -0.87    | 4.7x10 <sup>-9</sup>  | 1.8x10 <sup>-7</sup>  | 1.8x10 <sup>-5</sup>  |
| cg07786657       | <i>RCSD1</i>      | -0.27  | 3.2x10 <sup>-26</sup> | 1.2x10 <sup>-21</sup> | -0.39    | 2.0x10 <sup>-5</sup>  | 1.4x10 <sup>-4</sup>  | 8.0x10 <sup>-4</sup>  |
| cg08159663       | <i>NLRC5</i>      | -0.63  | 1.3x10 <sup>-25</sup> | 4.6x10 <sup>-21</sup> | -0.31    | 1.2x10 <sup>-2</sup>  | 2.9x10 <sup>-2</sup>  | 1.3x10 <sup>-4</sup>  |
| cg19517476       | <i>RASAL3</i>     | -0.27  | 2.6x10 <sup>-25</sup> | 9.0x10 <sup>-21</sup> | -0.87    | 1.6x10 <sup>-13</sup> | 6.5x10 <sup>-11</sup> | 2.8x10 <sup>-4</sup>  |
| cg12044599       | <i>TBC1D10C</i>   | -0.32  | 3.5x10 <sup>-25</sup> | 1.2x10 <sup>-20</sup> | -0.71    | 3.6x10 <sup>-7</sup>  | 5.4x10 <sup>-6</sup>  | 3.5x10 <sup>-3</sup>  |
| cg26833120       | <i>LCK</i>        | 0.46   | 4.8x10 <sup>-25</sup> | 1.6x10 <sup>-20</sup> | 0.73     | 4.8x10 <sup>-5</sup>  | 3.1x10 <sup>-4</sup>  | 1.6x10 <sup>-3</sup>  |
| cg02297541       | <i>HLA-DMA</i>    | 0.49   | 5.3x10 <sup>-25</sup> | 1.8x10 <sup>-20</sup> | 0.91     | 6.6x10 <sup>-10</sup> | 3.7x10 <sup>-8</sup>  | 9.2x10 <sup>-4</sup>  |
| cg06148175       | <i>ACY3</i>       | -0.65  | 5.7x10 <sup>-25</sup> | 1.9x10 <sup>-20</sup> | -0.35    | 2.8x10 <sup>-3</sup>  | 8.9x10 <sup>-3</sup>  | 2.7x10 <sup>-2</sup>  |
| cg00676801       | <i>STAT1</i>      | -0.55  | 7.0x10 <sup>-25</sup> | 2.2x10 <sup>-20</sup> | -1.3     | 8.2x10 <sup>-8</sup>  | 1.7x10 <sup>-6</sup>  | 8.5x10 <sup>-4</sup>  |
| cg12911952       | <i>SLC22A18AS</i> | -0.39  | 1.2x10 <sup>-24</sup> | 3.8x10 <sup>-20</sup> | -1.1     | 2.7x10 <sup>-7</sup>  | 4.3x10 <sup>-6</sup>  | 9.4x10 <sup>-5</sup>  |
| cg05141234       | <i>HLA-DMB</i>    | 0.57   | 1.8x10 <sup>-24</sup> | 5.3x10 <sup>-20</sup> | 0.75     | 3.5x10 <sup>-7</sup>  | 5.3x10 <sup>-6</sup>  | 2.9x10 <sup>-4</sup>  |
| cg00945209       | <i>TM68</i>       | -0.54  | 2.2x10 <sup>-24</sup> | 6.5x10 <sup>-20</sup> | -1.1     | 1.8x10 <sup>-9</sup>  | 8.2x10 <sup>-8</sup>  | 1.7x10 <sup>-2</sup>  |
| cg09878888       | <i>LPXN</i>       | 0.24   | 3.2x10 <sup>-24</sup> | 9.1x10 <sup>-20</sup> | 0.35     | 6.7x10 <sup>-3</sup>  | 1.8x10 <sup>-2</sup>  | 1.5x10 <sup>-4</sup>  |
| cg00676801       | <i>STAT4</i>      | -0.33  | 3.4x10 <sup>-24</sup> | 9.7x10 <sup>-20</sup> | -0.57    | 2.0x10 <sup>-8</sup>  | 5.5x10 <sup>-7</sup>  | 8.5x10 <sup>-4</sup>  |
| cg23387401       | <i>ALOX15</i>     | -0.37  | 9.7x10 <sup>-24</sup> | 2.6x10 <sup>-19</sup> | -0.64    | 6.2x10 <sup>-8</sup>  | 1.4x10 <sup>-6</sup>  | 1.0x10 <sup>-9</sup>  |
| cg13443575       | <i>CCL5</i>       | 0.54   | 1.3x10 <sup>-23</sup> | 3.5x10 <sup>-19</sup> | 0.77     | 7.8x10 <sup>-6</sup>  | 6.6x10 <sup>-5</sup>  | 5.5x10 <sup>-3</sup>  |

Replication defined as FDR P<0.05 with effect in the same direction as in EVA-PR. Only one gene per methylation probe presented.

## REFERENCES

- 1 Brugha, R. *et al.* DNA methylation profiles between airway epithelium and proxy tissues in children. *Acta Paediatrica* **106**, 2011-2016, doi:10.1111/apa.14027 (2017).
- 2 Forno, E. *et al.* DNA methylation in nasal epithelium, atopy, and atopic asthma in children: a genome-wide study. *The Lancet Respiratory Medicine* **7**, 336-346, doi:[https://doi.org/10.1016/S2213-2600\(18\)30466-1](https://doi.org/10.1016/S2213-2600(18)30466-1) (2019).
- 3 Liu, S. *et al.* EnhancerAtlas: a resource for enhancer annotation and analysis in 105 human cell/tissue types. *Bioinformatics* **32**, 3543-3551, doi:10.1093/bioinformatics/btw495 (2016).
- 4 Duan, Q. L. *et al.* A polymorphism in the thyroid hormone receptor gene is associated with bronchodilator response in asthmatics. *The pharmacogenomics journal* **13**, 130-136, doi:10.1038/tpj.2011.56 (2013).
- 5 Rastogi, D., Suzuki, M. & Grealley, J. M. Differential epigenome-wide DNA methylation patterns in childhood obesity-associated asthma. *Scientific reports* **3**, 2164-2164, doi:10.1038/srep02164 (2013).
- 6 Le, N. P. K., Channabasappa, S., Hossain, M., Liu, L. & Singh, B. Leukocyte-specific protein 1 regulates neutrophil recruitment in acute lung inflammation. *American journal of physiology. Lung cellular and molecular physiology* **309**, L995-L1008, doi:10.1152/ajplung.00068.2014 (2015).
- 7 Demenais, F. *et al.* Multiancestry association study identifies new asthma risk loci that colocalize with immune-cell enhancer marks. *Nature Genetics* **50**, 42-53, doi:10.1038/s41588-017-0014-7 (2018).
- 8 Movahedi, M. *et al.* Association of HLA class II alleles with childhood asthma and Total IgE levels. *Iran J Allergy Asthma Immunol* **7**, 215-220, doi:07.04/ijaa.215220 (2008).
- 9 Kim, N., Hong, Y., Kwon, D. & Yoon, S. Somatic mutome profile in human cancer tissues. *Genomics & informatics* **11**, 239-244, doi:10.5808/GI.2013.11.4.239 (2013).
- 10 Wyss, A. B. *et al.* Multiethnic meta-analysis identifies ancestry-specific and cross-ancestry loci for pulmonary function. *Nature Communications* **9**, 2976, doi:10.1038/s41467-018-05369-0 (2018).
- 11 Forno, E. *et al.* Gene expression in nasal epithelium and asthma in children: a transcriptome-wide and differential expression network analysis. *J Allergy Clin Immunol* (2020) Feb 10 [Epub ahead of print].
- 12 Yang, I. V. *et al.* The nasal methylome and childhood atopic asthma. *Journal of Allergy and Clinical Immunology* **139**, 1478-1488, doi:<https://doi.org/10.1016/j.jaci.2016.07.036> (2017).
- 13 Kim, S., Park, H. J., Cui, X. & Zhi, D. Leveraging collective regulatory effects of long-range DNA methylations to predict gene expressions and estimate their effects on phenotypes in cancer. *bioRxiv* (2018).
- 14 Gutierrez-Arcelus, M. *et al.* Passive and active DNA methylation and the interplay with genetic variation in gene regulation. *Elife* **2**, e00523, doi:10.7554/eLife.00523 (2013).
- 15 Gutierrez-Arcelus, M. *et al.* Tissue-specific effects of genetic and epigenetic variation on gene regulation and splicing. *PLoS Genet* **11**, e1004958, doi:10.1371/journal.pgen.1004958 (2015).
- 16 de Vries, M. *et al.* From blood to lung tissue: effect of cigarette smoke on DNA methylation and lung function. *Respiratory Research* **19**, 212, doi:10.1186/s12931-018-0904-y (2018).
- 17 Forno, E. *et al.* DNA methylation in nasal epithelium, atopy, and atopic asthma in children: a genome-wide study. *The Lancet Respiratory Medicine*, doi:10.1016/S2213-2600(18)30466-1.
- 18 Reese, S. E. *et al.* Epigenome-wide meta-analysis of DNA methylation and childhood asthma. *Journal of Allergy and Clinical Immunology* **143**, 2062-2074, doi:10.1016/j.jaci.2018.11.043 (2019).
- 19 Mora, A., Sandve, G. K., Gabrielsen, O. S. & Eskeland, R. In the loop: promoter-enhancer interactions and bioinformatics. *Brief Bioinform* **17**, 980-995, doi:10.1093/bib/bbv097 (2016).
- 20 Zemach, A., McDaniel, I. E., Silva, P. & Zilberman, D. Genome-wide evolutionary analysis of eukaryotic DNA methylation. *Science* **328**, 916-919, doi:10.1126/science.1186366 (2010).
- 21 Razin, A. & Cedar, H. DNA methylation and gene expression. *Microbiol Rev* **55**, 451-458 (1991).
- 22 Anastasiadi, D., Esteve-Codina, A. & Piferrer, F. Consistent inverse correlation between DNA methylation of the first intron and gene expression across tissues and species. *Epigenetics & chromatin* **11**, 37-37, doi:10.1186/s13072-018-0205-1 (2018).
- 23 Strunz, T. *et al.* A mega-analysis of expression quantitative trait loci (eQTL) provides insight into the regulatory architecture of gene expression variation in liver. *Scientific Reports* **8**, 5865, doi:10.1038/s41598-018-24219-z (2018).
- 24 Goh, W. W. B., Wang, W. & Wong, L. Why Batch Effects Matter in Omics Data, and How to Avoid Them. *Trends in Biotechnology* **35**, 498-507, doi:<https://doi.org/10.1016/j.tibtech.2017.02.012> (2017).
- 25 Nygaard, V., Rødland, E. A. & Hovig, E. Methods that remove batch effects while retaining group differences may lead to exaggerated confidence in downstream analyses. *Biostatistics* **17**, 29-39, doi:10.1093/biostatistics/kxv027 (2015).
- 26 Leek, J. T., Johnson, W. E., Parker, H. S., Jaffe, A. E. & Storey, J. D. The sva package for removing batch effects and other unwanted variation in high-throughput experiments. *Bioinformatics (Oxford, England)* **28**, 882-883, doi:10.1093/bioinformatics/bts034 (2012).
- 27 Shabalin, A. A. Matrix eQTL: ultra fast eQTL analysis via large matrix operations. *Bioinformatics (Oxford, England)* **28**, 1353-1358, doi:10.1093/bioinformatics/bts163 (2012).
- 28 Baron, R. M. & Kenny, D. A. The moderator-mediator variable distinction in social psychological research: Conceptual, strategic, and statistical considerations. *Journal of personality and social psychology* **51**, 1173 (1986).

- 29 Sobel, M. E. Asymptotic Confidence Intervals for Indirect Effects in Structural Equation Models. *Sociological Methodology* **13**, 290-312, doi:10.2307/270723 (1982).
- 30 Watanabe, K., Taskesen, E., van Bochoven, A. & Posthuma, D. Functional mapping and annotation of genetic associations with FUMA. *Nature Communications* **8**, 1826, doi:10.1038/s41467-017-01261-5 (2017).
